# Supplementary material for: Effect of SLC16A1 on Hepatic Glucose Metabolism in Newborn and Post-Weaned Holstein Bulls
Source: Front Genet. 2022 May 17;13:811849. doi: 10.3389/fgene.2022.811849 (PMC9156795; doi:10.3389/fgene.2022.811849)
Supplement: Supplementary file 3 [file Table9.XLSX]

## Sheet: Sheet1
Table S9 Top20 significantly enriched KEGG pathways.
KEGG_Pathway	Pathway_ID	Gene_number	Up_regulation	Down_regulation	Rich_factor	P_Value	Up_Genes	Down_Genes
Th17 cell differentiation	bta04659	19	19	0	0.182692	1.47241e-06	ENSBTAG00000012451(BOLA-DMB),ENSBTAG00000014983(IL23R),ENSBTAG00000011481(IL12RB1),ENSBTAG00000019588(BLA-DQB),ENSBTAG00000005892(ZAP70),ENSBTAG00000003255(CD4),ENSBTAG00000017243(GATA3),ENSBTAG00000002929(IRF4),ENSBTAG00000012695(LCK),ENSBTAG00000006490(BOLA-DOA),ENSBTAG00000037605(BOLA-DQA1),ENSBTAG00000006453(CD3G),ENSBTAG00000006452(CD3D),ENSBTAG00000015710(CD3E),ENSBTAG00000021249(LAT),ENSBT…	-
Th1 and Th2 cell differentiation	bta04658	15	15	0	0.176471	2.86689e-05	ENSBTAG00000012451(BOLA-DMB),ENSBTAG00000011481(IL12RB1),ENSBTAG00000019588(BLA-DQB),ENSBTAG00000005892(ZAP70),ENSBTAG00000003255(CD4),ENSBTAG00000017243(GATA3),ENSBTAG00000012695(LCK),ENSBTAG00000006490(BOLA-DOA),ENSBTAG00000037605(BOLA-DQA1),ENSBTAG00000006453(CD3G),ENSBTAG00000006452(CD3D),ENSBTAG00000015710(CD3E),ENSBTAG00000021249(LAT),ENSBTAG00000010645(BOLA-DRA),ENSBTAG00000014199(TBX21)	-
Steroid hormone biosynthesis	bta00140	19	18	1	0.395833	8.78788e-13	ENSBTAG00000000085(CYP1A2),ENSBTAG00000048013,ENSBTAG00000039643,ENSBTAG00000018365(CYP2E1),ENSBTAG00000004040(UGT2A1),ENSBTAG00000005287(CYP7A1),ENSBTAG00000037795(CYP2C87),ENSBTAG00000003234(HSD17B2),ENSBTAG00000022571(AKR1C3),ENSBTAG00000011720(HSD17B6),ENSBTAG00000015047,ENSBTAG00000003871(CYP2B6),ENSBTAG00000026501(MGC127055),ENSBTAG00000020789(STS),ENSBTAG00000003523,ENSBTAG00000001658(AKR1…	ENSBTAG00000005685(HSD11B2)
Staphylococcus aureus infection	bta05150	12	12	0	0.25	4.44262e-06	ENSBTAG00000012451(BOLA-DMB),ENSBTAG00000019588(BLA-DQB),ENSBTAG00000007450(C2),ENSBTAG00000007049(MBL2),ENSBTAG00000006490(BOLA-DOA),ENSBTAG00000037605(BOLA-DQA1),ENSBTAG00000021842(FCGR2B),ENSBTAG00000008612(C1R),ENSBTAG00000020755(SELP),ENSBTAG00000010645(BOLA-DRA),ENSBTAG00000002096(FCGR3A),ENSBTAG00000038124(FCGR2A)	-
Retinol metabolism	bta00830	20	19	1	0.444444	1.4816e-14	ENSBTAG00000000085(CYP1A2),ENSBTAG00000048013,ENSBTAG00000004040(UGT2A1),ENSBTAG00000034139(ADH4),ENSBTAG00000012212(CYP26B1),ENSBTAG00000037795(CYP2C87),ENSBTAG00000037559,ENSBTAG00000008103(ALDH1A1),ENSBTAG00000011720(HSD17B6),ENSBTAG00000018240(CYP2S1),ENSBTAG00000015047,ENSBTAG00000003871(CYP2B6),ENSBTAG00000021118(CYP26A1),ENSBTAG00000003523,ENSBTAG00000021934(RETSAT),ENSBTAG00000009725(AOX1…	ENSBTAG00000013481(CYP4A22)
Primary immunodeficiency	bta05340	13	13	0	0.433333	9.67809e-10	ENSBTAG00000005892(ZAP70),ENSBTAG00000003255(CD4),ENSBTAG00000020649(CIITA),ENSBTAG00000021596(ICOS),ENSBTAG00000012695(LCK),ENSBTAG00000001882(CD79A),ENSBTAG00000006452(CD3D),ENSBTAG00000015710(CD3E),ENSBTAG00000032122(CD19),ENSBTAG00000008953(TAP1),ENSBTAG00000019975(IL7R),ENSBTAG00000021141(CD8A),ENSBTAG00000021358(BLNK)	-
Primary bile acid biosynthesis	bta00120	6	6	0	0.428571	4.09397e-05	ENSBTAG00000003632(CYP39A1),ENSBTAG00000005287(CYP7A1),ENSBTAG00000034106(CYP8B1),ENSBTAG00000013489(CYP27A1),ENSBTAG00000021813(AMACR),ENSBTAG00000001658(AKR1D1)	-
Platinum drug resistance	bta01524	16	13	3	0.228571	4.32443e-07	ENSBTAG00000003548(GSTP1),ENSBTAG00000021516(GSTA1),ENSBTAG00000013573(BIRC5),ENSBTAG00000006546,ENSBTAG00000019262(TOP2A),ENSBTAG00000040298(GSTT1),ENSBTAG00000037673(GSTM1),ENSBTAG00000012692,ENSBTAG00000008587(GSTT2),ENSBTAG00000017765(GSTM1),ENSBTAG00000004288(GSTA4),ENSBTAG00000037949(GSTA5),ENSBTAG00000032808(FASLG)	ENSBTAG00000022613(CYCS),ENSBTAG00000023823,ENSBTAG00000008353(CDKN1A)
Metabolism of xenobiotics by cytochrome P450	bta00980	26	26	0	0.52	9.53837e-21	ENSBTAG00000000085(CYP1A2),ENSBTAG00000003548(GSTP1),ENSBTAG00000048013,ENSBTAG00000021516(GSTA1),ENSBTAG00000006546,ENSBTAG00000018365(CYP2E1),ENSBTAG00000004040(UGT2A1),ENSBTAG00000023384(CBR1),ENSBTAG00000034139(ADH4),ENSBTAG00000040298(GSTT1),ENSBTAG00000000140(EPHX1),ENSBTAG00000037673(GSTM1),ENSBTAG00000030629(MGC127133),ENSBTAG00000018240(CYP2S1),ENSBTAG00000012692,ENSBTAG00000008587(GSTT2…	-
HTLV-I infection	bta05166	24	21	3	0.118227	0.00014418	ENSBTAG00000012451(BOLA-DMB),ENSBTAG00000011059(CDKN2C),ENSBTAG00000005269(CCNB2),ENSBTAG00000012330(B2M),ENSBTAG00000019588(BLA-DQB),ENSBTAG00000003255(CD4),ENSBTAG00000012695(LCK),ENSBTAG00000006490(BOLA-DOA),ENSBTAG00000037605(BOLA-DQA1),ENSBTAG00000006453(CD3G),ENSBTAG00000006452(CD3D),ENSBTAG00000017514(CCND1),ENSBTAG00000015710(CD3E),ENSBTAG00000025471(TNF),ENSBTAG00000009819(CDC20),ENSBTAG…	ENSBTAG00000006343(IL1R2),ENSBTAG00000008353(CDKN1A),ENSBTAG00000019210(ADCY2)
Hematopoietic cell lineage	bta04640	23	19	4	0.258427	9.2673e-11	ENSBTAG00000012451(BOLA-DMB),ENSBTAG00000019588(BLA-DQB),ENSBTAG00000003255(CD4),ENSBTAG00000006490(BOLA-DOA),ENSBTAG00000017256(CD2),ENSBTAG00000037605(BOLA-DQA1),ENSBTAG00000006453(CD3G),ENSBTAG00000011887(CD22),ENSBTAG00000011359(CD7),ENSBTAG00000006452(CD3D),ENSBTAG00000015710(CD3E),ENSBTAG00000025471(TNF),ENSBTAG00000032122(CD19),ENSBTAG00000010645(BOLA-DRA),ENSBTAG00000019975(IL7R),ENSBTAG0…	ENSBTAG00000004909(GP1BA),ENSBTAG00000006343(IL1R2),ENSBTAG00000016881(ANPEP),ENSBTAG00000003430(EPO)
Glutathione metabolism	bta00480	15	11	4	0.306122	1.43773e-08	ENSBTAG00000003548(GSTP1),ENSBTAG00000021516(GSTA1),ENSBTAG00000006546,ENSBTAG00000040298(GSTT1),ENSBTAG00000037673(GSTM1),ENSBTAG00000012692,ENSBTAG00000008587(GSTT2),ENSBTAG00000017765(GSTM1),ENSBTAG00000008216(RRM2),ENSBTAG00000004288(GSTA4),ENSBTAG00000037949(GSTA5)	ENSBTAG00000016881(ANPEP),ENSBTAG00000005304(SRM),ENSBTAG00000004256(ODC1),ENSBTAG00000043553(GPX3)
Epstein-Barr virus infection	bta05169	26	22	4	0.142857	2.5877e-06	ENSBTAG00000012451(BOLA-DMB),ENSBTAG00000039861(OAS1Y),ENSBTAG00000012330(B2M),ENSBTAG00000001725(CXCL10),ENSBTAG00000010408(IKBKE),ENSBTAG00000019588(BLA-DQB),ENSBTAG00000006490(BOLA-DOA),ENSBTAG00000037605(BOLA-DQA1),ENSBTAG00000006453(CD3G),ENSBTAG00000006452(CD3D),ENSBTAG00000017514(CCND1),ENSBTAG00000015710(CD3E),ENSBTAG00000025471(TNF),ENSBTAG00000032122(CD19),ENSBTAG00000010645(BOLA-DRA),E…	ENSBTAG00000022613(CYCS),ENSBTAG00000023823,ENSBTAG00000008353(CDKN1A),ENSBTAG00000025462(GADD45B)
Drug metabolism - other enzymes	bta00983	21	19	2	0.33871	1.97322e-12	ENSBTAG00000003548(GSTP1),ENSBTAG00000048013,ENSBTAG00000021516(GSTA1),ENSBTAG00000006546,ENSBTAG00000018365(CYP2E1),ENSBTAG00000004040(UGT2A1),ENSBTAG00000040298(GSTT1),ENSBTAG00000012801(UPP2),ENSBTAG00000037673(GSTM1),ENSBTAG00000012692,ENSBTAG00000008587(GSTT2),ENSBTAG00000017765(GSTM1),ENSBTAG00000015047,ENSBTAG00000008216(RRM2),ENSBTAG00000004288(GSTA4),ENSBTAG00000037949(GSTA5),ENSBTAG0000…	ENSBTAG00000008428(UPP1),ENSBTAG00000044150(UCK2)
Drug metabolism - cytochrome P450	bta00982	21	21	0	0.446809	2.81329e-15	ENSBTAG00000000085(CYP1A2),ENSBTAG00000003548(GSTP1),ENSBTAG00000048013,ENSBTAG00000010841(FMO5),ENSBTAG00000021516(GSTA1),ENSBTAG00000006546,ENSBTAG00000018365(CYP2E1),ENSBTAG00000004040(UGT2A1),ENSBTAG00000034139(ADH4),ENSBTAG00000040298(GSTT1),ENSBTAG00000037673(GSTM1),ENSBTAG00000012692,ENSBTAG00000008587(GSTT2),ENSBTAG00000017765(GSTM1),ENSBTAG00000015047,ENSBTAG00000004288(GSTA4),ENSBTAG000…	-
Chemical carcinogenesis	bta05204	28	28	0	0.518519	3.32214e-22	ENSBTAG00000000085(CYP1A2),ENSBTAG00000003548(GSTP1),ENSBTAG00000048013,ENSBTAG00000021516(GSTA1),ENSBTAG00000006546,ENSBTAG00000018365(CYP2E1),ENSBTAG00000004040(UGT2A1),ENSBTAG00000023384(CBR1),ENSBTAG00000034139(ADH4),ENSBTAG00000040298(GSTT1),ENSBTAG00000037795(CYP2C87),ENSBTAG00000037559,ENSBTAG00000000140(EPHX1),ENSBTAG00000037673(GSTM1),ENSBTAG00000030629(MGC127133),ENSBTAG00000012692,ENSB…	-
Asthma	bta05310	8	7	1	0.275862	8.39923e-05	ENSBTAG00000012451(BOLA-DMB),ENSBTAG00000019588(BLA-DQB),ENSBTAG00000006490(BOLA-DOA),ENSBTAG00000012887(FCER1A),ENSBTAG00000037605(BOLA-DQA1),ENSBTAG00000025471(TNF),ENSBTAG00000010645(BOLA-DRA)	ENSBTAG00000025664
Ascorbate and aldarate metabolism	bta00053	6	5	1	0.375	9.97996e-05	ENSBTAG00000048013,ENSBTAG00000004040(UGT2A1),ENSBTAG00000015047,ENSBTAG00000003523,ENSBTAG00000039647	ENSBTAG00000002559(MIOX)
Arachidonic acid metabolism	bta00590	13	10	3	0.2	2.45725e-05	ENSBTAG00000039643,ENSBTAG00000018365(CYP2E1),ENSBTAG00000008779(ALOX15B),ENSBTAG00000023384(CBR1),ENSBTAG00000037795(CYP2C87),ENSBTAG00000022571(AKR1C3),ENSBTAG00000030629(MGC127133),ENSBTAG00000003871(CYP2B6),ENSBTAG00000011019,ENSBTAG00000038549	ENSBTAG00000013481(CYP4A22),ENSBTAG00000046977(PLA2G2D5),ENSBTAG00000043553(GPX3)
Antigen processing and presentation	bta04612	13	13	0	0.2	2.45725e-05	ENSBTAG00000012451(BOLA-DMB),ENSBTAG00000012330(B2M),ENSBTAG00000019588(BLA-DQB),ENSBTAG00000003255(CD4),ENSBTAG00000020649(CIITA),ENSBTAG00000006490(BOLA-DOA),ENSBTAG00000037605(BOLA-DQA1),ENSBTAG00000046979(LGMN),ENSBTAG00000025471(TNF),ENSBTAG00000015228(CD74),ENSBTAG00000008953(TAP1),ENSBTAG00000010645(BOLA-DRA),ENSBTAG00000021141(CD8A)	-
